# Supplementary material for: Long-Term Mechanical Ventilation in Neonates: A 10-Year Overview and Predictive Model
Source: PubMed Central journal article supplement (PMC8313736; doi:10.3389/fped.2021.689190), 2021-07-13
Supplement: Data_Sheet_1.pdf [file Data_Sheet_1.pdf]

## Supplementary Material

### 1 Supplementary Tables

#### 1.1 Supplementary Table 1: Number of Patients per Gestational Age and per Primary Diagnosis

| Ventilation | Primary Diagnosis      | Gestational age (weeks) |    |    |    |    |    |    |    |    |    |    |    |    |    |    |    |    |    |    |
|-------------|------------------------|-------------------------|----|----|----|----|----|----|----|----|----|----|----|----|----|----|----|----|----|----|
|             |                        | 22                      | 23 | 24 | 25 | 26 | 27 | 28 | 29 | 30 | 31 | 32 | 33 | 34 | 35 | 36 | 37 | 38 | 39 | 40 |
| < 125 days  | Airways                | 0                       | 0  | 0  | 0  | 0  | 0  | 0  | 2  | 0  | 0  | 1  | 0  | 0  | 0  | 2  | 0  | 0  | 1  | 0  |
| < 125 days  | Cardiovascular         | 0                       | 0  | 0  | 0  | 1  | 0  | 0  | 1  | 0  | 1  | 0  | 0  | 0  | 0  | 4  | 6  | 0  | 4  | 1  |
| < 125 days  | Isolated prematurity   | 0                       | 1  | 7  | 9  | 10 | 10 | 5  | 4  | 3  | 4  | 0  | 0  | 0  | 0  | 0  | 0  | 0  | 0  | 0  |
| < 125 days  | Multiple               | 0                       | 0  | 0  | 2  | 0  | 0  | 1  | 1  | 1  | 0  | 0  | 0  | 0  | 2  | 0  | 0  | 0  | 0  | 0  |
| < 125 days  | Neuromuscular disorder | 0                       | 0  | 0  | 0  | 1  | 0  | 0  | 0  | 0  | 1  | 0  | 1  | 0  | 1  | 0  | 2  | 0  | 1  | 0  |
| < 125 days  | Thoraco-abdominal      | 0                       | 0  | 0  | 0  | 0  | 0  | 0  | 0  | 0  | 0  | 1  | 0  | 0  | 1  | 4  | 5  | 3  | 1  | 0  |
| ≥ 125 days  | Airways                | 0                       | 0  | 0  | 0  | 0  | 1  | 0  | 0  | 0  | 0  | 0  | 0  | 0  | 0  | 0  | 0  | 0  | 0  | 0  |
| ≥ 125 days  | Cardiovascular         | 0                       | 0  | 0  | 0  | 0  | 0  | 0  | 0  | 0  | 0  | 0  | 1  | 0  | 0  | 0  | 0  | 1  | 1  | 0  |
| ≥ 125 days  | Isolated prematurity   | 1                       | 3  | 7  | 3  | 11 | 5  | 1  | 2  | 1  | 0  | 0  | 0  | 0  | 0  | 0  | 0  | 0  | 0  | 0  |
| ≥ 125 days  | Multiple               | 0                       | 0  | 0  | 0  | 0  | 1  | 0  | 1  | 0  | 0  | 2  | 0  | 0  | 0  | 1  | 0  | 0  | 0  | 0  |
| ≥ 125 days  | Neuromuscular disorder | 0                       | 0  | 0  | 0  | 0  | 0  | 0  | 0  | 1  | 1  | 0  | 0  | 1  | 0  | 0  | 0  | 0  | 0  | 0  |
| ≥ 125 days  | Thoraco-abdominal      | 0                       | 0  | 0  | 0  | 0  | 0  | 0  | 0  | 0  | 0  | 0  | 0  | 0  | 0  | 0  | 1  | 4  | 0  | 0  |

## 1.2 Supplementary Table 2: Variables Definitions

| Variables                                               | Definition                                                                                                                                                                                            |
|---------------------------------------------------------|-------------------------------------------------------------------------------------------------------------------------------------------------------------------------------------------------------|
| Bicarbonates                                            | Measures in an arterial, capillary or venous blood sample                                                                                                                                             |
| Birth weight z-score                                    | Normalized with Olsen's growth curves                                                                                                                                                                 |
| Cardiovascular disease                                  | Congenital heart or vessels structural malformation                                                                                                                                                   |
| Congenital diaphragmatic hernia or pulmonary hypoplasia | Pulmonary hypoplasia relied on a volumetric radiological modality.                                                                                                                                    |
| Early pulmonary dysplasia <sup>c</sup>                  | Based on the radiological report during the first week of life.                                                                                                                                       |
| Esophageal atresia                                      |                                                                                                                                                                                                       |
| Female                                                  |                                                                                                                                                                                                       |
| FiO <sub>2</sub>                                        | Inspired oxygen concentration                                                                                                                                                                         |
| Gestational age                                         | Expressed in weeks                                                                                                                                                                                    |
| Inclusion weight (Z)                                    | Weight z-score at inclusion using World Health Organization growth curves                                                                                                                             |
| Invasive ventilation                                    | Ventilation through an infraglottic device                                                                                                                                                            |
| Lobar emphysema                                         | Lobar emphysema on at least two radiological reports before inclusion                                                                                                                                 |
| Mean airways pressure                                   | Mean airways pressure read by the ventilator                                                                                                                                                          |
| Neuromuscular disease                                   | Neurological (central or peripheral) disease and/or muscular pathology diagnosed by a pediatric neurologist                                                                                           |
| PCO <sub>2</sub>                                        | CO <sub>2</sub> partial pressure in blood gas (arterial, capillary or venous)                                                                                                                         |
| PEEP                                                    | Positive end-expiratory pressure set on a ventilator (invasive or not)                                                                                                                                |
| Persistent ductus arteriosus                            | Ductus arteriosus that required an interventional or surgical ligation                                                                                                                                |
| Polymalformative syndrome with airways lesion           | Congenital malformation touching two organs or more, including the airways                                                                                                                            |
| Polymalformative syndrome with heart disease            | Congenital malformation touching two organs or more, including the heart                                                                                                                              |
| Pulmonary hypertension <sup>b</sup>                     | Defined by at least two echocardiograms with type II or III septum or a valve regurgitation that allowed for an estimation of the pulmonary pressures to be more than half of systemic pressures (39) |
| Sepsis                                                  | clinically diagnosed with a positive culture                                                                                                                                                          |
| Severe intraventricular hemorrhage                      | Intraventricular hemorrhage grade 3 and 4 (40)                                                                                                                                                        |
| SpO <sub>2</sub>                                        | Pulsed oximetry measuring oxygen hemoglobin saturation                                                                                                                                                |
| Surgical necrotizing enterocolitis                      | Necrotizing enterocolitis that required a surgical treatment                                                                                                                                          |
| Tracheal hypoplasia                                     | Diagnosis proven by direct endoscopy                                                                                                                                                                  |
| Tracheobronchomalacia                                   | Diagnosis proven by direct endoscopy                                                                                                                                                                  |

### 1.3 Supplementary Table 3: Characteristics at Inclusion - Unadjusted Odds Ratios

| Variables <sup>a</sup>                        | All children<br>(n=164) | Ventilation<br>Days ≥ 125<br>days<br>(n=52) | Ventilation<br>Days < 125<br>days<br>(n=112) | Unadjusted Odds<br>Ratios <sup>c</sup> (95%<br>CI) | P     |
|-----------------------------------------------|-------------------------|---------------------------------------------|----------------------------------------------|----------------------------------------------------|-------|
|                                               | n (%) or median (IQR)   |                                             |                                              |                                                    |       |
| Weight at inclusion, Z-score                  | -0.5 [-1 – 0.3]         | -0.8 [-2 – 0.1]                             | -0.5 [-1 – 0.3]                              | 0.86 (0.66 – 1.12)                                 | 0.27  |
| PCO <sub>2</sub> , mmHg                       | 62 [53 – 68]            | 67 [61 – 71]                                | 60 [52 – 66]                                 | 1.04 (1.01 – 1.07)                                 | 0.01  |
| Bicarbonate, mEq/L                            | 31 [28 – 34]            | 33 [30 – 35]                                | 30 [28 – 33]                                 | 1.07 (1 – 1.14)                                    | 0.06  |
| Invasive ventilation                          | 61 (37)                 | 18 (35)                                     | 43 (38)                                      | 0.85 (0.42 – 1.68)                                 | 0.64  |
| PEEP, cmH <sub>2</sub> O                      | 6 [5 – 6]               | 6 [5 – 6]                                   | 5 [5 – 6]                                    | 1.44 (1.04 – 2.09)                                 | 0.04  |
| FiO <sub>2</sub> , %                          | 30 [25 – 40]            | 40 [30 – 46]                                | 28 [23 – 40]                                 | 1.01 (0.99 – 1.03)                                 | 0.16  |
| SpO <sub>2</sub> , % <sup>b</sup>             | 94 [93 – 96]            | 94 [92 – 96]                                | 94 [93 – 96]                                 | 1.01 (0.96 – 1.09)                                 | 0.68  |
| SpO <sub>2</sub> /FiO <sub>2</sub> ratio      | 313 [224 – 384]         | 248 [191 – 322]                             | 333 [238 – 401]                              | 1 (0.99 – 1)                                       | <0.01 |
| <b>Diagnosis <sup>b</sup></b>                 |                         |                                             |                                              |                                                    |       |
| Pulmonary hypertension                        | 70 (43)                 | 24 (46)                                     | 46 (41)                                      | 1.23 (0.63 – 2.39)                                 | 0.54  |
| Early pulmonary dysplasia <sup>c</sup>        | 67 (41)                 | 20 (38)                                     | 47 (42)                                      | 0.86 (0.44 – 1.69)                                 | 0.67  |
| Lobar emphysema                               | 60 (37)                 | 16 (31)                                     | 44 (39)                                      | 0.69 (0.33 – 1.37)                                 | 0.29  |
| Patent ductus arteriosus                      | 28 (17)                 | 8 (15)                                      | 20 (18)                                      | 0.84 (0.32 – 1.99)                                 | 0.70  |
| Cardiovascular disease                        | 26 (16)                 | 6 (12)                                      | 20 (18)                                      | 0.6 (0.21 – 1.52)                                  | 0.31  |
| CDH or pulmonary hypoplasia                   | 16 (10)                 | 5 (10)                                      | 11 (10)                                      | 0.98 (0.29 – 2.85)                                 | 0.97  |
| Neuromuscular disease                         | 13 (8)                  | 3 (6)                                       | 10 (9)                                       | 0.62 (0.14 – 2.15)                                 | 0.49  |
| Esophageal atresia                            | 10 (6)                  | 3 (6)                                       | 7 (6)                                        | 0.92 (0.19 – 3.46)                                 | 0.90  |
| Polymalformative syndrome with heart disease  | 10 (6)                  | 2 (4)                                       | 8 (7)                                        | 0.52 (0.08 – 2.17)                                 | 0.42  |
| Sepsis                                        | 10 (6)                  | 3 (6)                                       | 7 (6)                                        | 0.74 (0.17 – 2.35)                                 | 0.63  |
| Tracheobronchomalacia                         | 10 (6)                  | 1 (2)                                       | 9 (8)                                        | 0.22 (0.01 – 1.24)                                 | 0.16  |
| Surgical necrotizing enterocolitis            | 9 (5)                   | 3 (6)                                       | 6 (5)                                        | 1.08 (0.22 – 4.28)                                 | 0.91  |
| Polymalformative syndrome with airways lesion | 8 (5)                   | 2 (4)                                       | 6 (5)                                        | 0.71 (0.1 – 3.19)                                  | 0.68  |

IQR: Interquartile range. CI: confidence interval. Odds ratio were adjusted for gestational age and sex. CDH: Congenital diaphragmatic hernia. PEEP: positive end-expiratory pressure. <sup>a</sup> Most recent value before inclusion. <sup>b</sup> Total is not equal to 100% because each patient can have more than one diagnosis. <sup>c</sup> Adjusted for gender and gestational age.

## 1.4 Supplementary Table 4: Outcomes at 18 Months of Corrected Age – Unadjusted Odds Ratios

| Variables                                                   | All children<br>(n=164) | Ventilation Days<br>≥ 125 days<br>(n=52) | Ventilation Days<br>< 125 days<br>(n=112) | Unadjusted Odds<br>Ratios <sup>b</sup> (95% CI) | P      |
|-------------------------------------------------------------|-------------------------|------------------------------------------|-------------------------------------------|-------------------------------------------------|--------|
|                                                             | n (%) or median [IQR]   |                                          |                                           |                                                 |        |
| Mortality                                                   | 47 (29)                 | 11 (21)                                  | 36 (32)                                   | 0.57 (0.25 – 1.2)                               | 0.15   |
| Lost to follow-up or<br>inadequate information to<br>assess | 8 (5)                   | 1 (2)                                    | 7 (6)                                     | 0.29 (0.02 – 1.72)                              | 0.26   |
| Hospitalized at 18 months<br>of corrected age               | 4 (3)                   | 3 (7)                                    | 1 (1)                                     | 5.92 (0.73 – 121.91)                            | 0.13   |
| <b>Respiratory status <sup>a</sup></b>                      |                         |                                          |                                           |                                                 |        |
| No respiratory support                                      | 97 (83)                 | 31 (76)                                  | 66 (87)                                   | 0.47 (0.17 – 1.26)                              | 0.13   |
| Invasive ventilation                                        | 2 (2)                   | 1 (2)                                    | 1 (1)                                     | 1.87 (0.07 – 48.26)                             | 0.66   |
| Noninvasive ventilation                                     | 3 (3)                   | 3 (7)                                    | 0                                         | -                                               | -      |
| High flow nasal cannula                                     | 1 (1)                   | 1 (2)                                    | 0                                         | -                                               | -      |
| Standard nasal cannula                                      | 6 (5)                   | 4 (10)                                   | 2 (3)                                     | 4 (0.75 – 29.81)                                | 0.12   |
| Tracheostomy                                                | 3 (2)                   | 1 (2)                                    | 2 (2)                                     | 1.08 (0.05 – 11.51)                             | 0.95   |
| <b>Nutritional status <sup>a</sup></b>                      |                         |                                          |                                           |                                                 |        |
| Exclusive oral feeding                                      | 74 (72)                 | 20 (51)                                  | 54 (84)                                   | 0.19 (0.07 – 0.48)                              | <0.001 |
| Weight, kg                                                  | 10 [9 – 11]             | 10 [9 – 11]                              | 10 [9 – 12]                               | 0.84 (0.63 – 1.11)                              | 0.23   |
| Weight, Z-score                                             | -0.9 [-2 – 0]           | -0.9 [-2 – -0.4]                         | -0.9 [-1 – 0.7]                           | 0.77 (0.53 – 1.09)                              | 0.15   |
| <b>Neurological status</b>                                  |                         |                                          |                                           |                                                 |        |
| PCPC                                                        | 3 [2 – 3]               | 3 [2 – 3]                                | 2 [2 – 3]                                 | 2.02 (1.19 – 3.63)                              | 0.01   |
| POPC                                                        | 3 [2 – 3]               | 3 [2 – 3]                                | 2 [2 – 3]                                 | 1.62 (1.04 – 2.59)                              | 0.04   |

IQR: Interquartile range. PCPC: Pediatric Cerebral Performance Category. POPC: Pediatric Overall Performance Category. <sup>a</sup> Only available data were used to calculate percentages. <sup>b</sup> Adjusted for gender and gestational age.

## 2 Supplementary Figures

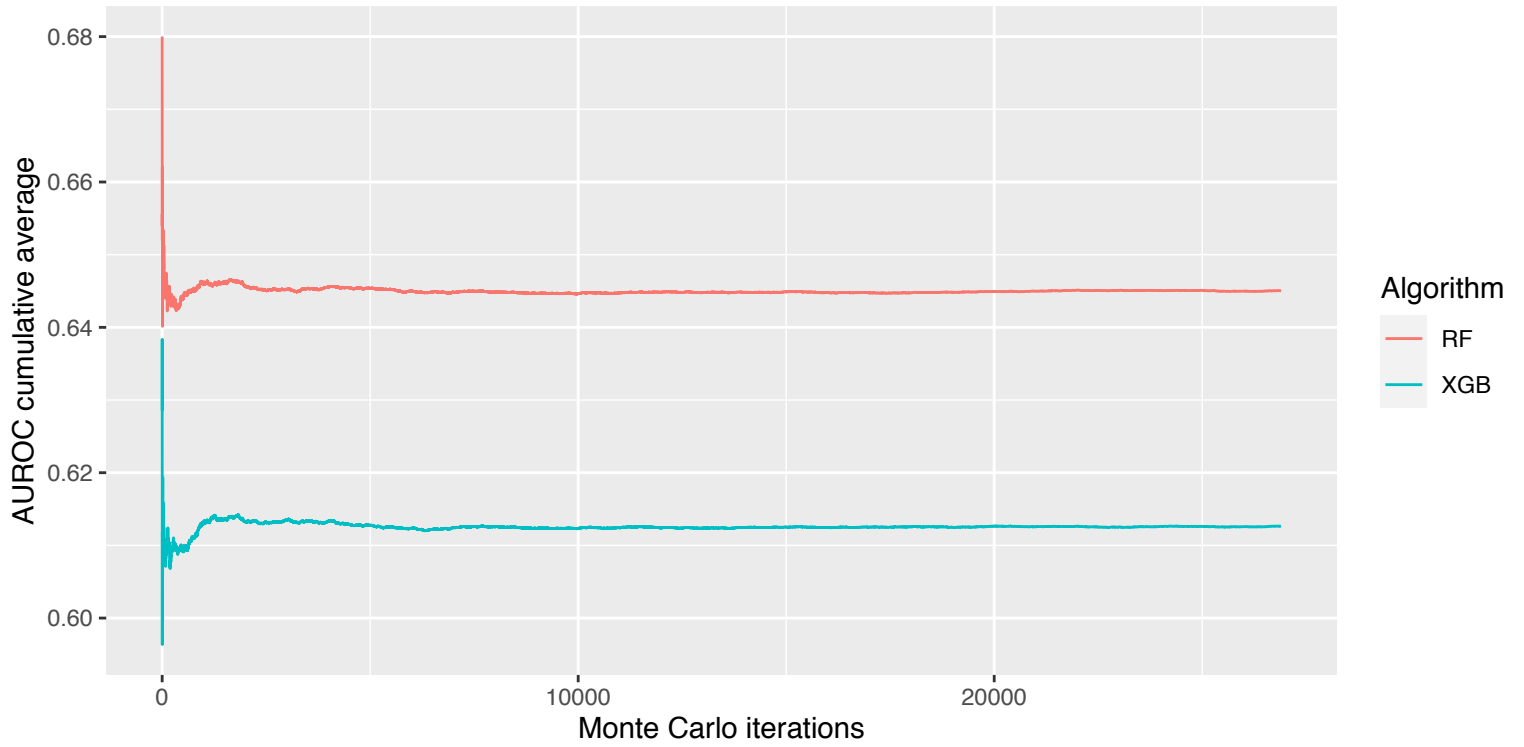

**Supplementary Figure 1:** Model convergence over the Monte Carlo iterations. RF: random forests. XGB: eXtreme Gradient Boosting
